# Supplementary material
Source: publisher figshare collection journal article supplement (https://tandf.figshare.com/ndownloader/files/18792608)
Supplement: Supplementary file 1 [file 18792608]

**Supplementary materia**l: Question content and responses for the AUDIT-C and AUDIT-D.

| 1. How often do you have a drink containing alcohol? | Never (0) | Monthly or less (1) | 2-3 times a month (2) | 2-3 times a week (3) | 4 or more times a week (4) |
| --- | --- | --- | --- | --- | --- |
| 2. How many standard drinks do you have on a typical day when you are drinking? | 1 or 2 (0) | 3 or 4 (1) | 5 or 6 (2) | 7 to 9 (3) | 10 or more (4) |
| 3. How often do you have six or more standard drinks on one occasion? | Never (0) | less than monthly (1) | Monthly (2) | Weekly (3) | Daily or almost daily (4) |
| 4. How often during the last year have you found that you were not able to stop drinking once you had started? | Never (0) | less than monthly (1) | Monthly (2) | Weekly (3) | Daily or almost daily (4) |
| 5. How often during the last year have you failed to do what was normally expected of you because of drinking? | Never (0) | less than monthly (1) | Monthly (2) | Weekly (3) | Daily or almost daily (4) |
| 6. How often during the last year have you needed a first drink in the morning to get yourself going after a heavy drinking session? | Never (0) | less than monthly (1) | Monthly (2) | Weekly (3) | Daily or almost daily (4) |
|  |  |  |  |  |  |
| Scoring: AUDIT-C sum responses from questions 1-3. AUDIT-D sum responses from questions 4-6. | | | | | |
| Note: The AUDIT contains four additional questions targeting alcohol-related harms but scores from these questions were not utilised in the current study. If the respondent indicates they never drink alcohol (question 1) then they are skipped from the remaining questions and receive a score of 0 on the AUDIT-C and AUDIT-D. | | | | | |

| **Table 1: LORDIF results for SIAS** | | | | | | | |
| --- | --- | --- | --- | --- | --- | --- | --- |
| item | chi12 | chi13 | chi23 | beta12 | pseudo12.McFadden | pseudo13.McFadden | pseudo23.McFadden |
|  |  |  |  |  |  |  |  |
| 1 | 0.9908 | 0.9963 | 0.9242 | 0.0001 | 0.0000 | 0.0001 | 0.0000 |
| 2 | 0.3591 | 0.3397 | 0.2901 | 0.0055 | 0.0006 | 0.0014 | 0.0008 |
| 3 | 0.2931 | 0.3874 | 0.4306 | 0.0071 | 0.0007 | 0.0012 | 0.0005 |
| 4 | 0.5727 | 0.2778 | 0.1368 | 0.0006 | 0.0003 | 0.0015 | 0.0012 |
| 5 | 0.0807 | 0.2822 | 0.9925 | 0.0036 | 0.0016 | 0.0017 | 0.0000 |
| 6 | 0.7259 | 0.4185 | 0.1951 | 0.0019 | 0.0002 | 0.0012 | 0.0010 |
| 7 | 0.0000 | 0.0000 | 0.9744 | 0.0109 | 0.0075 | 0.0075 | 0.0000 |
| 8 | 0.0917 | 0.0221 | 0.0359 | 0.006 | 0.0017 | 0.0041 | 0.0024 |
| 9 | 0.0002 | 0.0009 | 0.3979 | 0.0129 | 0.0063 | 0.007 | 0.0007 |
| 10 | 0.1273 | 0.3115 | 0.7227 | 0.0064 | 0.0013 | 0.0015 | 0.0002 |
| 11 | 0.3574 | 0.0631 | 0.0324 | 0.0073 | 0.0007 | 0.0031 | 0.0024 |
| 12 | 0.7033 | 0.718 | 0.4984 | 0.0005 | 0.0002 | 0.0006 | 0.0004 |
| 13 | 0.4418 | 0.3935 | 0.2923 | 0.0068 | 0.0005 | 0.0013 | 0.0008 |
| 14 | 0.7821 | 0.4901 | 0.2312 | 0.0033 | 0.0001 | 0.0010 | 0.0009 |
| 15 | 0.179 | 0.0802 | 0.0867 | 0.0049 | 0.0012 | 0.0030 | 0.0017 |
| 16 | 0.8162 | 0.5524 | 0.269 | 0.0001 | 0.0001 | 0.0009 | 0.0008 |
| 17 | 0.0062 | 0.0291 | 0.7368 | 0.0071 | 0.0030 | 0.0032 | 0.0002 |
| 18 | 0.3579 | 0.1 | 0.0571 | 0.0036 | 0.0006 | 0.0023 | 0.0017 |
| 19 | 0.0895 | 0.2834 | 0.9002 | 0.0015 | 0.0014 | 0.0015 | 0.0001 |
| 20 | 0.0788 | 0.1129 | 0.3026 | 0.0091 | 0.0015 | 0.0022 | 0.0007 |
| Notes: chi12= p-value associated with difference in log-likelihood test between model 1 and model 2. Chi13 = p-value associated with difference in log-likelihood test between model 1 and model 3. Chi23= p=value association with difference in log-likelihood test between model 2 and model 3. Beta12= different in beta coefficients between model 1 and model 2. Pseudo12McFadden = different in McFadden’s pseudo R-square between model1 and model 2. Pseudo13McFadden = different in McFadden’s pseudo R-square between model 1 and model 3. Pseudo23McFadden = different in McFadden’s pseudo R-square between model 2 and model 3 | | | | | | | |
| **Table 2: LORDIF results for SPS** | | | | | | | |
| item | chi12 | chi13 | chi23 | beta12 | pseudo12.McFadden | pseudo13.McFadden | pseudo23.McFadden |
|  |  |  |  |  |  |  |  |
| 1 | 0.1734 | 0.3264 | 0.5672 | 0.0013 | 0.0012 | 0.0016 | 0.0004 |
| 2 | 0.635 | 0.8797 | 0.8684 | 0.0054 | 0.0003 | 0.0004 | 0.0001 |
| 3 | 0.088 | 0.1473 | 0.3807 | 0.0063 | 0.0015 | 0.0021 | 0.0006 |
| 4 | 0.9915 | 0.3294 | 0.1005 | 0.0002 | 0.0000 | 0.0014 | 0.0014 |
| 5 | 0.9481 | 0.3772 | 0.128 | 0.001 | 0.0000 | 0.0018 | 0.0017 |
| 6 | 0.0372 | 0.1475 | 0.9018 | 0.0089 | 0.002 | 0.002 | 0.0001 |
| 7 | 0.1841 | 0.2591 | 0.3862 | 0.003 | 0.0012 | 0.0018 | 0.0007 |
| 8 | 0.6204 | 0.8881 | 0.9122 | 0.0009 | 0.0003 | 0.0004 | 0.0001 |
| 9 | 0.0936 | 0.0381 | 0.0671 | 0.0031 | 0.002 | 0.0042 | 0.0022 |
| 10 | 0.0397 | 0.0677 | 0.3175 | 0.006 | 0.0055 | 0.0074 | 0.002 |
| 11 | 0.591 | 0.2842 | 0.1368 | 0.0008 | 0.0004 | 0.0017 | 0.0014 |
| 12 | 0.7149 | 0.916 | 0.8662 | 0.001 | 0.0002 | 0.0003 | 0.0001 |
| 13 | 0.0369 | 0.1217 | 0.7106 | 0.0015 | 0.0022 | 0.0024 | 0.0002 |
| 14 | 0.7304 | 0.7756 | 0.5614 | 0.0016 | 0.0002 | 0.0006 | 0.0004 |
| 15 | 0.3868 | 0.3436 | 0.2737 | 0.0008 | 0.0006 | 0.0014 | 0.0008 |
| 16 | 0.6848 | 0.4913 | 0.2651 | 0.0014 | 0.0002 | 0.0011 | 0.0009 |
| 17 | 0.0447 | 0.1597 | 0.8327 | 0.0073 | 0.0021 | 0.0022 | 0.0001 |
| 18 | 0.9968 | 0.2202 | 0.0572 | 0.0002 | 0.0000 | 0.0017 | 0.0017 |
| 19 | 0.2228 | 0.3343 | 0.4567 | 0.0038 | 0.0027 | 0.0042 | 0.0014 |
| 20 | 0.0802 | 0.2382 | 0.7905 | 0.0059 | 0.0015 | 0.0016 | 0.0001 |
| Notes: chi12= p-value associated with difference in log-likelihood test between model 1 and model 2. Chi13 = p-value associated with difference in log-likelihood test between model 1 and model 3. Chi23= p=value association with difference in log-likelihood test between model 2 and model 3. Beta12= different in beta coefficients between model 1 and model 2. Pseudo12McFadden = different in McFadden’s pseudo R-square between model1 and model 2. Pseudo13McFadden = different in McFadden’s pseudo R-square between model 1 and model 3. Pseudo23McFadden = different in McFadden’s pseudo R-square between model 2 and model 3 | | | | | | | |
